# Supplementary material for: Prediction of Drug Side Effects with a Refined Negative Sample Selection Strategy
Source: Hindawi journal article supplement (doi:10.1155/2020/1573543), 2020-05-09
Supplement: f1 [file 1573543.f1.pdf]

**Table S1.** The performance of the SVM models with different quality negative samples

| <b>Threshold</b> | <b>SN</b> | <b>SP</b> | <b>ACC</b> | <b>MCC</b> | <b>precision</b> | <b>F1-measure</b> |
|------------------|-----------|-----------|------------|------------|------------------|-------------------|
| $\varepsilon_1$  | 0.656     | 1.000     | 0.894      | 0.754      | 1.000            | 0.792             |
| $\varepsilon_2$  | 0.651     | 0.985     | 0.884      | 0.721      | 0.950            | 0.773             |
| $\varepsilon_3$  | 0.545     | 0.932     | 0.826      | 0.533      | 0.749            | 0.631             |
| $\varepsilon_4$  | 0.526     | 0.872     | 0.787      | 0.411      | 0.575            | 0.549             |
| $\varepsilon_5$  | 0.000     | 1.000     | 0.791      | 0.000      | 0.000            | 0.000             |
| $\varepsilon_6$  | 0.000     | 1.000     | 0.820      | 0.000      | 0.000            | 0.000             |
| $\varepsilon_7$  | 0.000     | 1.000     | 0.838      | 0.000      | 0.000            | 0.000             |
| $\varepsilon_8$  | 0.000     | 1.000     | 0.848      | 0.000      | 0.000            | 0.000             |
| $\varepsilon_9$  | 0.000     | 1.000     | 0.854      | 0.000      | 0.000            | 0.000             |

**Table S2.** The performance of the ANN models with different quality negative samples

| <b>Threshold</b> | <b>SN</b> | <b>SP</b> | <b>ACC</b> | <b>MCC</b> | <b>precision</b> | <b>F1-measure</b> |
|------------------|-----------|-----------|------------|------------|------------------|-------------------|
| $\varepsilon_1$  | 0.670     | 1.000     | 0.898      | 0.764      | 1.000            | 0.802             |
| $\varepsilon_2$  | 0.680     | 0.982     | 0.891      | 0.737      | 0.943            | 0.791             |
| $\varepsilon_3$  | 0.641     | 0.922     | 0.846      | 0.595      | 0.756            | 0.693             |
| $\varepsilon_4$  | 0.506     | 0.906     | 0.807      | 0.452      | 0.652            | 0.559             |
| $\varepsilon_5$  | 0.198     | 0.969     | 0.808      | 0.273      | 0.634            | 0.298             |
| $\varepsilon_6$  | 0.084     | 0.987     | 0.824      | 0.145      | 0.411            | 0.140             |
| $\varepsilon_7$  | 0.059     | 0.991     | 0.839      | 0.125      | 0.438            | 0.104             |
| $\varepsilon_8$  | 0.035     | 0.993     | 0.848      | 0.067      | 0.235            | 0.060             |
| $\varepsilon_9$  | 0.000     | 1.000     | 0.854      | 0.000      | 0.000            | 0.000             |

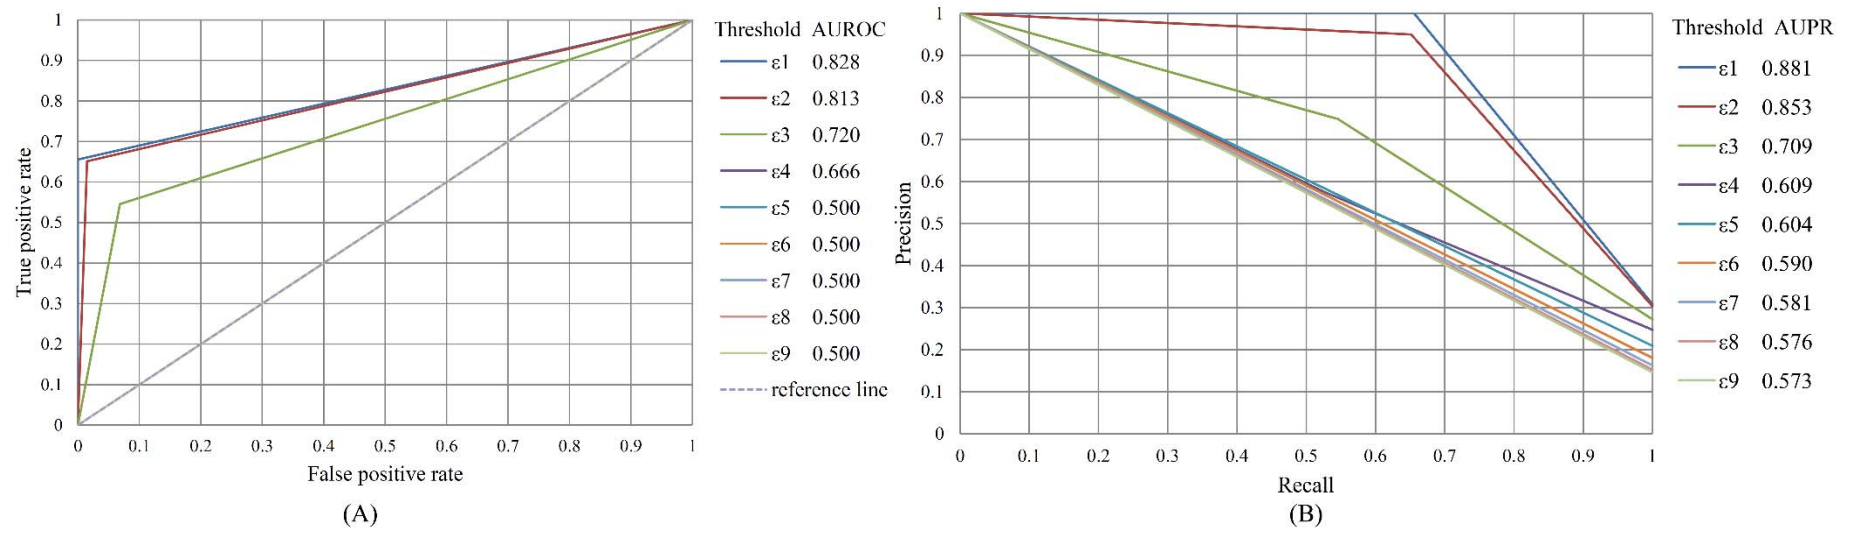

**Figure S1.** The ROC curves and PR curves of the SVM models with different quality negative samples. (A) The ROC curves; (B) The PR curves.

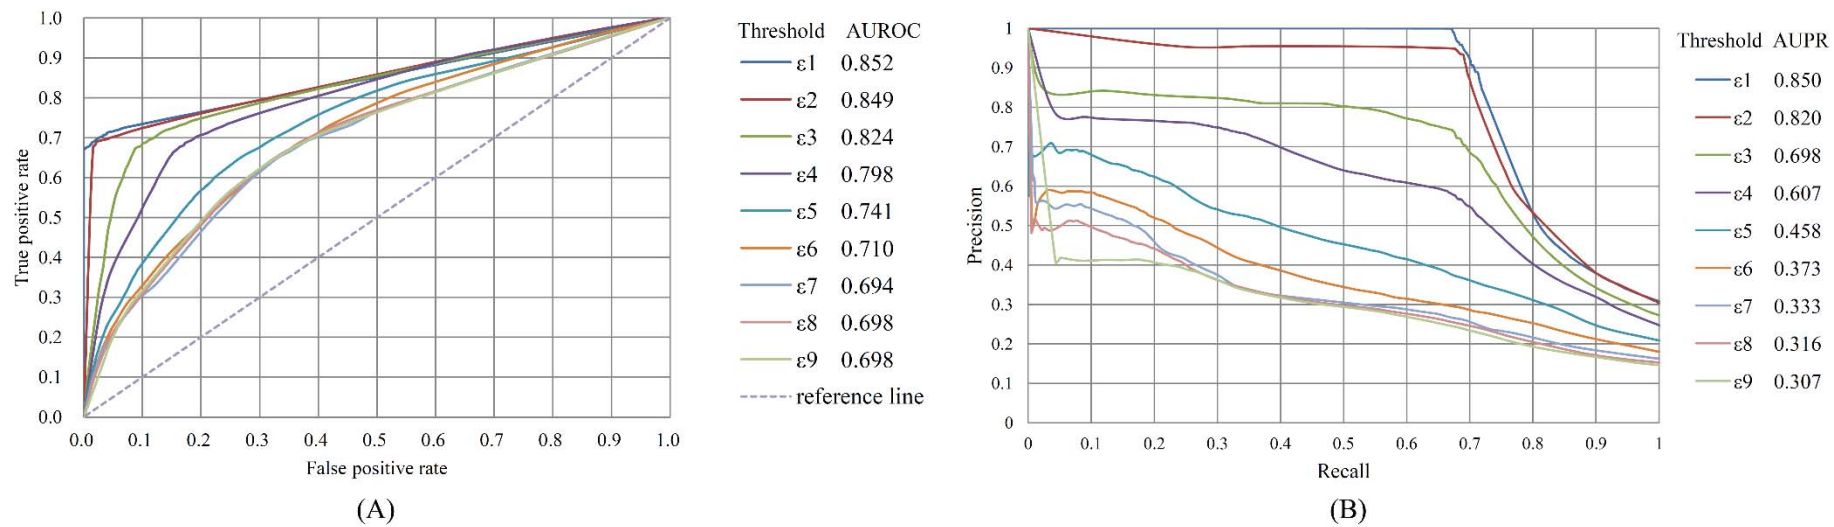

**Figure S2.** The ROC curves and PR curves of the ANN models with different quality negative samples. (A) The ROC curves; (B) The PR curves.

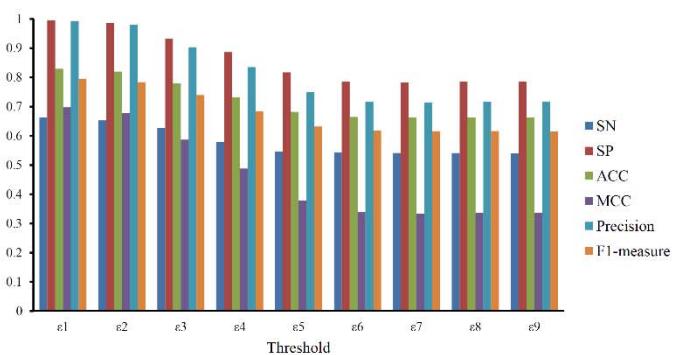

(A)

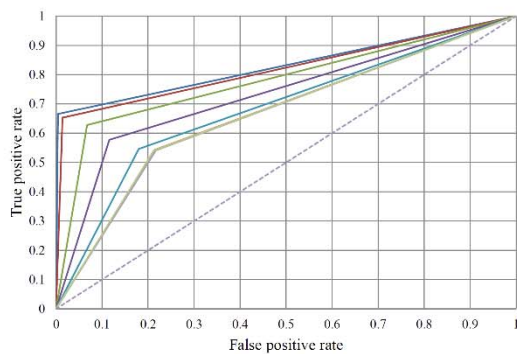

(B)

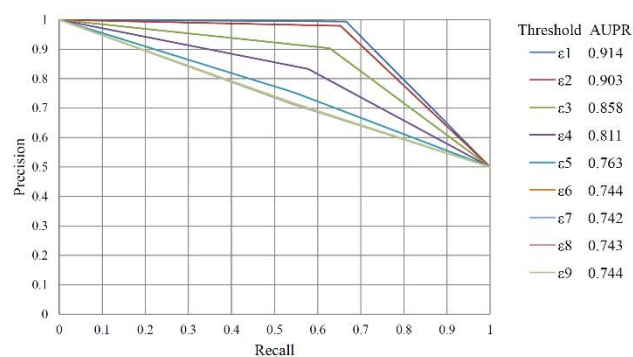

(C)

**Figure S3.** The performance of the SVM models on balanced datasets, in which negative samples, as many as positive samples, are randomly selected under different thresholds. (A) Six measurements; (B) The ROC curves; (C) The PR curves.

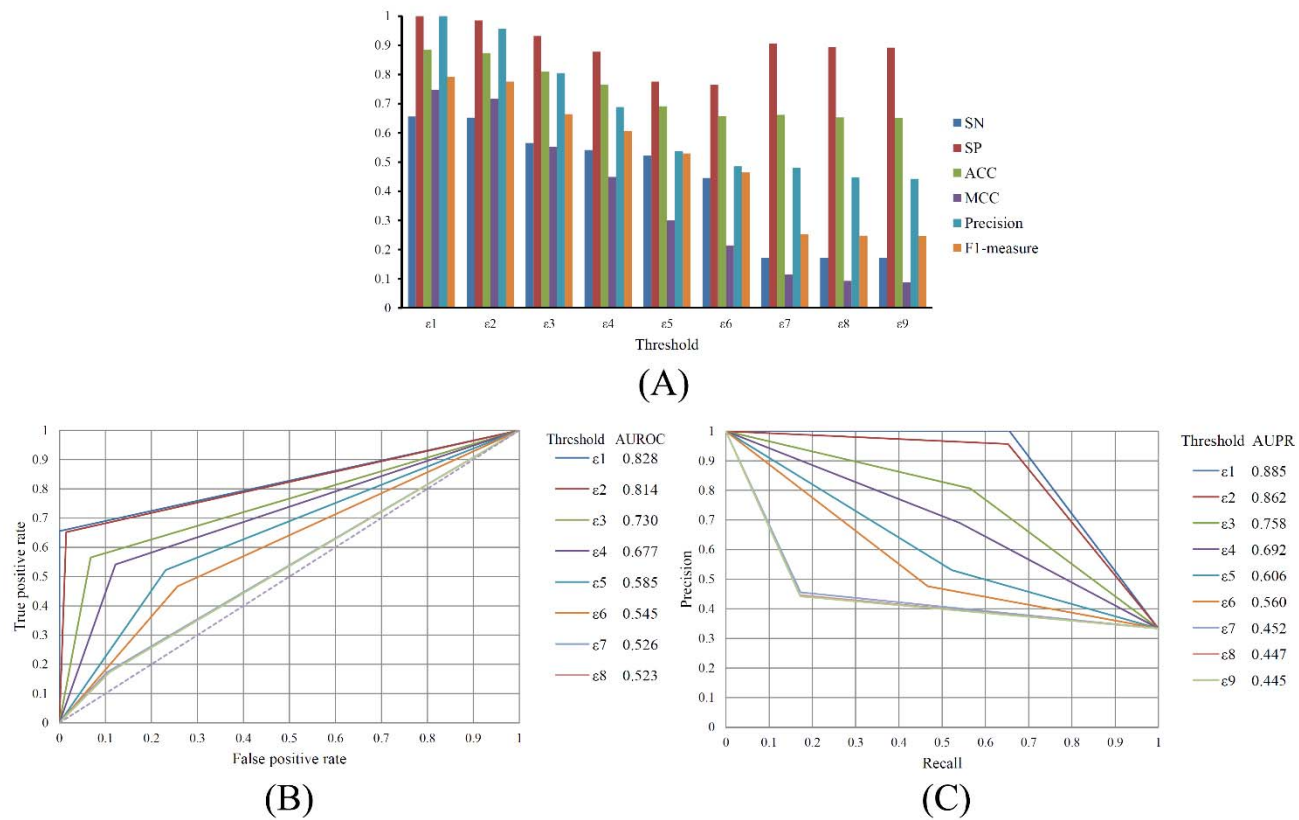

**Figure S4.** The performance of the SVM models on imbalanced datasets, in which negative samples, twice as many as positive samples, are randomly selected under different thresholds. (A) Six measurements; (B) The ROC curves; (C) The PR curves.

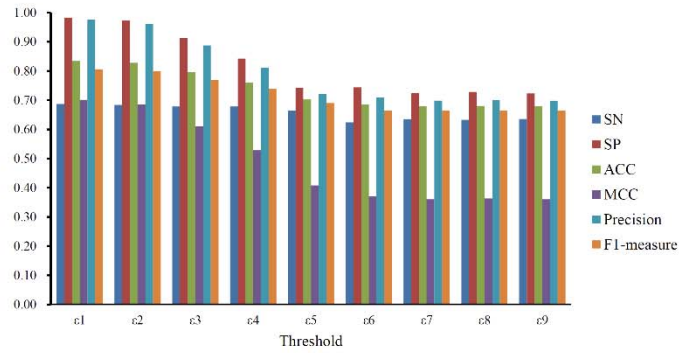

(A)

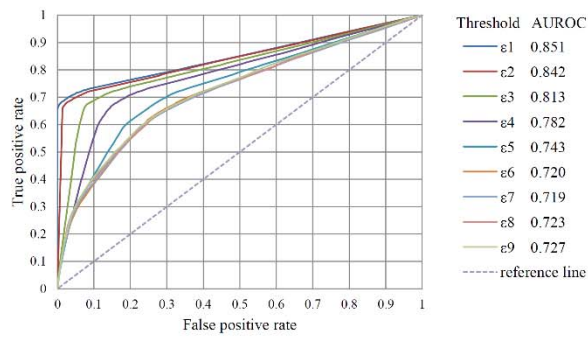

(B)

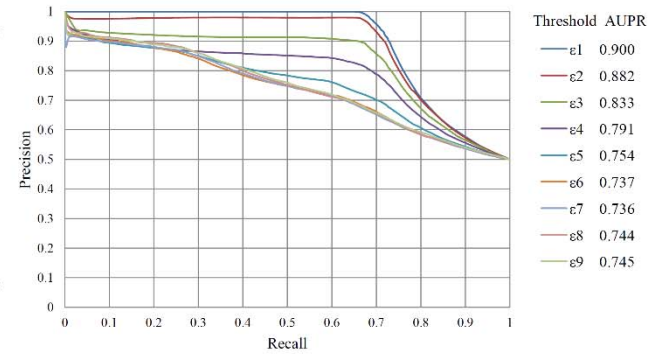

(C)

**Figure S5.** The performance of the ANN models on balanced datasets, in which negative samples, as many as positive samples, are randomly selected under different thresholds. (A) Six measurements; (B) The ROC curves; (C) The PR curves.

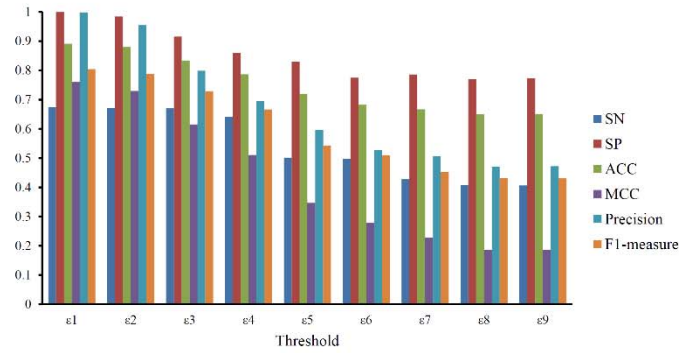

(A)

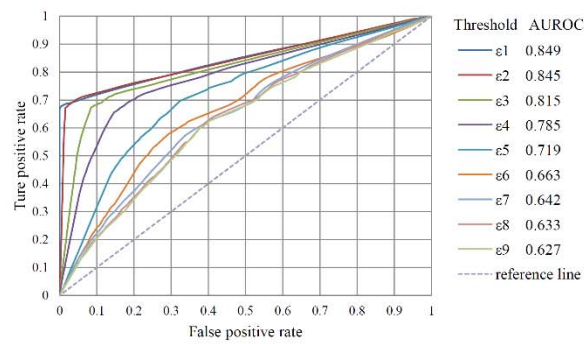

(B)

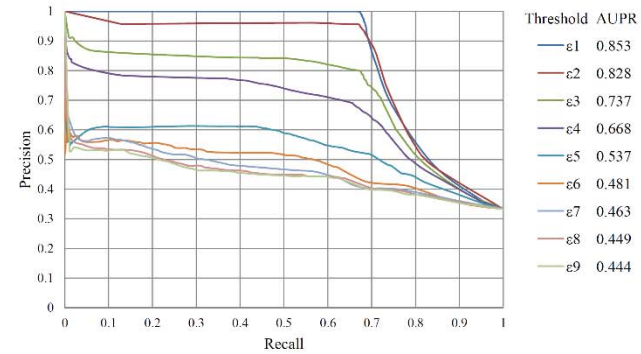

(C)

**Figure S6.** The performance of the ANN models on imbalanced datasets, in which negative samples, twice as many as positive samples, are randomly selected under different thresholds. (A) Six measurements; (B) The ROC curves; (C) The PR curves.



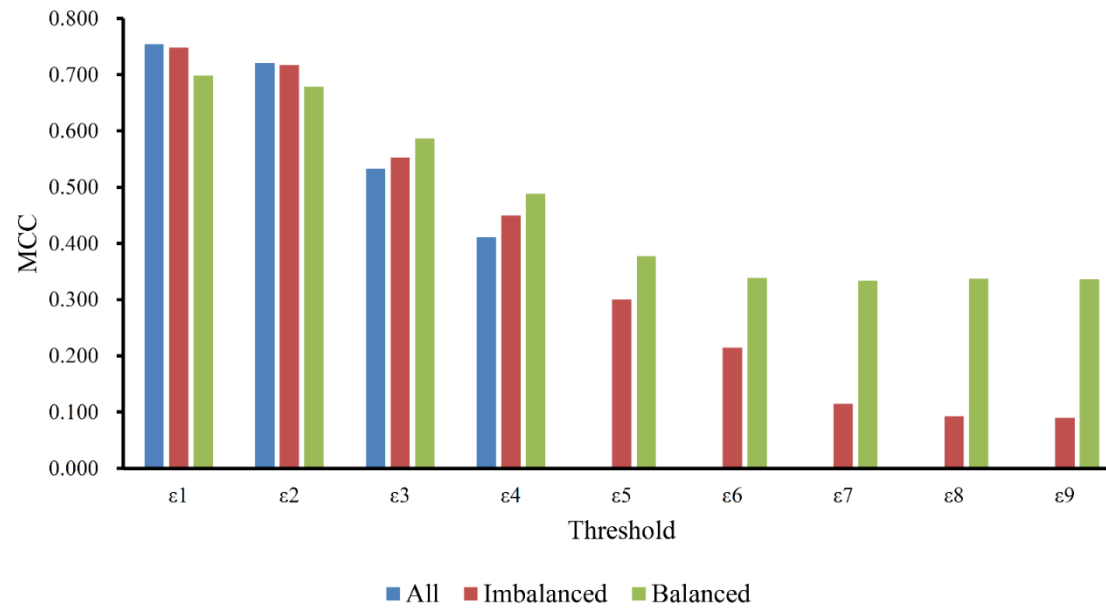

**Figure S7.** The MCCs yielded by the SVM models on three types of datasets. ‘All’ means that all negative samples under the given the threshold are selected, ‘Imbalanced’ indicates that negative samples, twice as many as positive samples, under the given threshold are randomly selected, ‘Balanced’ indicates that negative samples, as many as positive samples, under the given threshold are randomly selected.

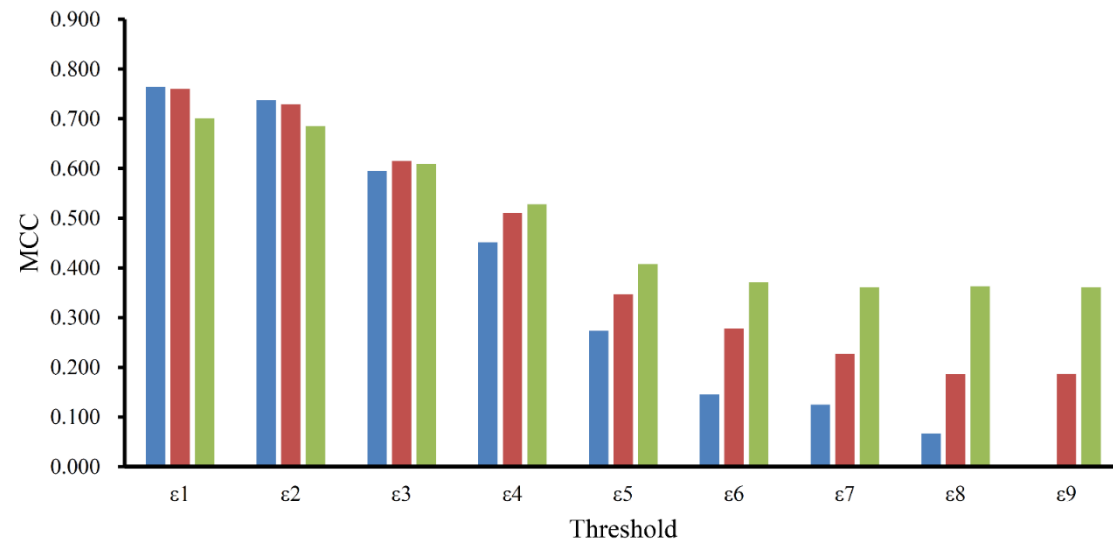

**Figure S8.** The MCCs yielded by the ANN models on three types of datasets. ‘All’ means that all negative samples under the given the threshold are selected, ‘Imbalanced’ indicates that negative samples, twice as many as positive samples, under the given threshold are randomly selected, ‘Balanced’ indicates that negative samples, as many as positive samples, under the given threshold are randomly selected.
